# Supplementary material
Source: publisher figshare collection journal article supplement (https://acs.figshare.com/ndownloader/files/4068706)
Supplement: Supplementary file 1 [file 4068706]

 
data_p1 
  
_audit_creation_method            SHELXL-97 
_chemical_name_systematic 
; 
 ? 
; 
_chemical_name_common             ? 
_chemical_melting_point           ? 
_chemical_formula_moiety          ? 
_chemical_formula_sum 
 'C47 H38 N4 O5 Zn' 
_chemical_formula_weight          804.18 
  
loop_ 
 _atom_type_symbol 
 _atom_type_description 
 _atom_type_scat_dispersion_real 
 _atom_type_scat_dispersion_imag 
 _atom_type_scat_source 
 'C'  'C'   0.0181   0.0091 
 'International Tables Vol C Tables 4.2.6.8 and 6.1.1.4' 
 'H'  'H'   0.0000   0.0000 
 'International Tables Vol C Tables 4.2.6.8 and 6.1.1.4' 
 'N'  'N'   0.0311   0.0180 
 'International Tables Vol C Tables 4.2.6.8 and 6.1.1.4' 
 'O'  'O'   0.0492   0.0322 
 'International Tables Vol C Tables 4.2.6.8 and 6.1.1.4' 
 'Zn'  'Zn'  -1.5491   0.6778 
 'International Tables Vol C Tables 4.2.6.8 and 6.1.1.4' 
  
_symmetry_cell_setting            Triclinic 
_symmetry_space_group_name_H-M    P-1 
  
loop_ 
 _symmetry_equiv_pos_as_xyz 
 'x, y, z' 
 '-x, -y, -z' 
  
_cell_length_a                    12.5921(4) 
_cell_length_b                    12.9701(4) 
_cell_length_c                    14.8500(5) 
_cell_angle_alpha                 111.9920(10) 
_cell_angle_beta                  96.5610(10) 
_cell_angle_gamma                 97.7270(10) 
_cell_volume                      2192.36(12) 
_cell_formula_units_Z             2 
_cell_measurement_temperature     100(2) 
_cell_measurement_reflns_used     9825 
_cell_measurement_theta_min       3.26 
_cell_measurement_theta_max       65.19 
  
_exptl_crystal_description        block 
_exptl_crystal_colour             green 
_exptl_crystal_size_max           0.55 
_exptl_crystal_size_mid           0.47 
_exptl_crystal_size_min           0.27 
_exptl_crystal_density_meas       'not measured' 
_exptl_crystal_density_diffrn     1.218 
_exptl_crystal_density_method     'not measured' 
_exptl_crystal_F_000              836 
_exptl_absorpt_coefficient_mu     1.163 
_exptl_absorpt_correction_type    multi-scan 
_exptl_absorpt_correction_T_min   0.5661 
_exptl_absorpt_correction_T_max   0.7434 
_exptl_absorpt_process_details    'SADABS; Sheldrick, 2004 [Sheldrick, G. M. (2004)]' 
  
_exptl_special_details 
; 
 Estimated minimum and maximum transmission:  0.7670  0.9434 
; 
  
_diffrn_ambient_temperature       100(2) 
_diffrn_radiation_wavelength      1.54178 
_diffrn_radiation_type            CuK\a 
_diffrn_radiation_source          'fine-focus sealed tube' 
_diffrn_radiation_monochromator   graphite 
_diffrn_measurement_device_type   'Bruker APEX-II CCD' 
_diffrn_measurement_method        '\f and \w scans' 
_diffrn_detector_area_resol_mean  ? 
_diffrn_reflns_number             23334 
_diffrn_reflns_av_R_equivalents   0.0272 
_diffrn_reflns_av_sigmaI/netI     0.0219 
_diffrn_reflns_limit_h_min        -14 
_diffrn_reflns_limit_h_max        14 
_diffrn_reflns_limit_k_min        -14 
_diffrn_reflns_limit_k_max        11 
_diffrn_reflns_limit_l_min        -16 
_diffrn_reflns_limit_l_max        16 
_diffrn_reflns_theta_min          3.26 
_diffrn_reflns_theta_max          61.00 
_reflns_number_total              6348 
_reflns_number_gt                 6109 
_reflns_threshold_expression      >2sigma(I) 
  
_computing_data_collection        'Bruker APEX2' 
_computing_cell_refinement        'Bruker SAINT' 
_computing_data_reduction         'Bruker SAINT' 
_computing_structure_solution     'SHELXS-97 (Sheldrick, 2008)' 
_computing_structure_refinement   'SHELXL-97 (Sheldrick, 2008)' 
_computing_molecular_graphics     'Bruker SHELXTL' 
_computing_publication_material   'Bruker SHELXTL' 
  
_refine_special_details 
; 
 Refinement of F^2^ against ALL reflections.  The weighted R-factor wR and 
 goodness of fit S are based on F^2^, conventional R-factors R are based 
 on F, with F set to zero for negative F^2^. The threshold expression of 
 F^2^ > 2sigma(F^2^) is used only for calculating R-factors(gt) etc. and is 
 not relevant to the choice of reflections for refinement.  R-factors based 
 on F^2^ are statistically about twice as large as those based on F, and R- 
 factors based on ALL data will be even larger. Hydrogen atoms were assigned 
 ideal positions and refined isotropically as riding atoms with the exception
 of the hydrogen atom on the axial methanol which was located on the difference
 map and refined on normally.  A SQuEEZE was performed on the structure using 
 the Platon program which removed 360 electrons of density or approximately 
 20 solvent methanol molecules. 
; 
  
_refine_ls_structure_factor_coef  Fsqd 
_refine_ls_matrix_type            full 
_refine_ls_weighting_scheme       calc 
_refine_ls_weighting_details 
 'calc w=1/[\s^2^(Fo^2^)+(0.0892P)^2^+7.4737P] where P=(Fo^2^+2Fc^2^)/3' 
_atom_sites_solution_primary      direct 
_atom_sites_solution_secondary    difmap 
_atom_sites_solution_hydrogens    geom 
_refine_ls_hydrogen_treatment     mixed 
_refine_ls_extinction_method      none 
_refine_ls_extinction_coef        ? 
_refine_ls_number_reflns          6348 
_refine_ls_number_parameters      522 
_refine_ls_number_restraints      0 
_refine_ls_R_factor_all           0.0645 
_refine_ls_R_factor_gt            0.0629 
_refine_ls_wR_factor_ref          0.1748 
_refine_ls_wR_factor_gt           0.1734 
_refine_ls_goodness_of_fit_ref    0.968 
_refine_ls_restrained_S_all       0.968 
_refine_ls_shift/su_max           0.000 
_refine_ls_shift/su_mean          0.000 
  
loop_ 
 _atom_site_label 
 _atom_site_type_symbol 
 _atom_site_fract_x 
 _atom_site_fract_y 
 _atom_site_fract_z 
 _atom_site_U_iso_or_equiv 
 _atom_site_adp_type 
 _atom_site_occupancy 
 _atom_site_symmetry_multiplicity 
 _atom_site_calc_flag 
 _atom_site_refinement_flags 
 _atom_site_disorder_assembly 
 _atom_site_disorder_group 
C1 C 0.6626(3) 0.2414(3) 0.3812(3) 0.0316(9) Uani 1 1 d . . . 
C2 C 0.7522(3) 0.2243(4) 0.4464(3) 0.0458(12) Uani 1 1 d . . . 
C3 C 0.7601(5) 0.2725(5) 0.5577(4) 0.0581(13) Uani 1 1 d . . . 
H3 H 0.7813 0.3567 0.5816 0.070 Uiso 1 1 calc R . . 
C4 C 0.6518(6) 0.2475(6) 0.5865(5) 0.0788(19) Uani 1 1 d . . . 
H4A H 0.6269 0.1653 0.5618 0.118 Uiso 1 1 calc R . . 
H4B H 0.5985 0.2804 0.5580 0.118 Uiso 1 1 calc R . . 
H4C H 0.6596 0.2805 0.6586 0.118 Uiso 1 1 calc R . . 
C5 C 0.8511(5) 0.2321(5) 0.6085(4) 0.0753(18) Uani 1 1 d . . . 
H5A H 0.8293 0.1509 0.5925 0.113 Uiso 1 1 calc R . . 
H5B H 0.8622 0.2741 0.6802 0.113 Uiso 1 1 calc R . . 
H5C H 0.9190 0.2457 0.5849 0.113 Uiso 1 1 calc R . . 
C6 C 0.8655(5) 0.1901(6) 0.3215(4) 0.0730(17) Uani 1 1 d . . . 
H6A H 0.8564 0.1079 0.3013 0.109 Uiso 1 1 calc R . . 
H6B H 0.9371 0.2198 0.3118 0.109 Uiso 1 1 calc R . . 
H6C H 0.8084 0.2072 0.2815 0.109 Uiso 1 1 calc R . . 
C7 C 0.6435(3) 0.0579(4) 0.3375(3) 0.0356(10) Uani 1 1 d . . . 
C8 C 0.6106(3) -0.0593(3) 0.2887(3) 0.0325(9) Uani 1 1 d . . . 
C9 C 0.6658(3) -0.1315(3) 0.3305(3) 0.0334(9) Uani 1 1 d . . . 
C10 C 0.7393(4) -0.1910(4) 0.2828(3) 0.0472(11) Uani 1 1 d . . . 
H10 H 0.7553 -0.1868 0.2231 0.057 Uiso 1 1 calc R . . 
C11 C 0.7905(4) -0.2577(4) 0.3222(4) 0.0562(13) Uani 1 1 d . . . 
H11 H 0.8419 -0.2983 0.2897 0.067 Uiso 1 1 calc R . . 
C12 C 0.7669(4) -0.2648(4) 0.4075(4) 0.0513(13) Uani 1 1 d . . . 
H12 H 0.8017 -0.3105 0.4339 0.062 Uiso 1 1 calc R . . 
C13 C 0.6940(5) -0.2068(4) 0.4545(4) 0.0581(14) Uani 1 1 d . . . 
H13 H 0.6774 -0.2120 0.5137 0.070 Uiso 1 1 calc R . . 
C14 C 0.6436(4) -0.1398(4) 0.4159(4) 0.0494(12) Uani 1 1 d . . . 
H14 H 0.5929 -0.0989 0.4493 0.059 Uiso 1 1 calc R . . 
C15 C 0.5312(3) -0.1123(4) 0.2029(3) 0.0321(9) Uani 1 1 d . . . 
C16 C 0.4877(3) -0.2319(4) 0.1586(3) 0.0373(10) Uani 1 1 d . . . 
H16 H 0.5099 -0.2875 0.1799 0.045 Uiso 1 1 calc R . . 
C17 C 0.4098(3) -0.2507(4) 0.0815(3) 0.0345(9) Uani 1 1 d . . . 
H17 H 0.3665 -0.3220 0.0386 0.041 Uiso 1 1 calc R . . 
C18 C 0.4036(3) -0.1433(4) 0.0756(3) 0.0318(9) Uani 1 1 d . . . 
C19 C 0.3298(3) -0.1271(3) 0.0070(3) 0.0309(9) Uani 1 1 d . . . 
C20 C 0.2503(3) -0.2268(4) -0.0686(3) 0.0331(9) Uani 1 1 d . . . 
C21 C 0.2855(3) -0.3173(4) -0.1361(3) 0.0349(9) Uani 1 1 d . . . 
H21 H 0.3613 -0.3153 -0.1353 0.042 Uiso 1 1 calc R . . 
C22 C 0.2105(3) -0.4112(4) -0.2051(3) 0.0399(10) Uani 1 1 d . . . 
H22 H 0.2353 -0.4726 -0.2509 0.048 Uiso 1 1 calc R . . 
C23 C 0.1009(4) -0.4141(4) -0.2063(3) 0.0444(11) Uani 1 1 d . . . 
H23 H 0.0497 -0.4777 -0.2530 0.053 Uiso 1 1 calc R . . 
C24 C 0.0653(3) -0.3257(4) -0.1406(4) 0.0484(12) Uani 1 1 d . . . 
H24 H -0.0106 -0.3282 -0.1418 0.058 Uiso 1 1 calc R . . 
C25 C 0.1389(3) -0.2328(4) -0.0724(4) 0.0412(10) Uani 1 1 d . . . 
H25 H 0.1128 -0.1719 -0.0274 0.049 Uiso 1 1 calc R . . 
C26 C 0.3218(3) -0.0192(4) 0.0092(3) 0.0341(9) Uani 1 1 d . . . 
C27 C 0.2545(3) 0.1084(5) -0.0366(3) 0.0451(12) Uani 1 1 d . . . 
C28 C 0.3326(3) 0.1629(4) 0.0501(3) 0.0341(9) Uani 1 1 d . . . 
C29 C 0.3604(3) 0.2797(4) 0.1043(3) 0.0355(10) Uani 1 1 d . . . 
C30 C 0.3023(3) 0.3564(4) 0.0699(3) 0.0356(9) Uani 1 1 d . . . 
C31 C 0.3184(4) 0.3697(4) -0.0150(3) 0.0443(11) Uani 1 1 d . . . 
H31 H 0.3673 0.3305 -0.0530 0.053 Uiso 1 1 calc R . . 
C32 C 0.2638(4) 0.4403(4) -0.0463(3) 0.0513(12) Uani 1 1 d . . . 
H32 H 0.2748 0.4480 -0.1059 0.062 Uiso 1 1 calc R . . 
C33 C 0.1943(4) 0.4986(4) 0.0082(4) 0.0484(12) Uani 1 1 d . . . 
H33 H 0.1564 0.5455 -0.0143 0.058 Uiso 1 1 calc R . . 
C34 C 0.1788(4) 0.4896(4) 0.0963(4) 0.0476(11) Uani 1 1 d . . . 
H34 H 0.1318 0.5313 0.1349 0.057 Uiso 1 1 calc R . . 
C35 C 0.2335(3) 0.4180(4) 0.1274(3) 0.0433(11) Uani 1 1 d . . . 
H35 H 0.2239 0.4113 0.1876 0.052 Uiso 1 1 calc R . . 
C36 C 0.4383(3) 0.3342(4) 0.1919(3) 0.0325(9) Uani 1 1 d . . . 
C37 C 0.4759(3) 0.4516(4) 0.2401(3) 0.0366(10) Uani 1 1 d . . . 
H37 H 0.4509 0.5079 0.2215 0.044 Uiso 1 1 calc R . . 
C38 C 0.5544(3) 0.4704(4) 0.3183(3) 0.0357(9) Uani 1 1 d . . . 
H38 H 0.5943 0.5419 0.3644 0.043 Uiso 1 1 calc R . . 
C39 C 0.5654(3) 0.3624(4) 0.3178(3) 0.0313(9) Uani 1 1 d . . . 
C40 C 0.6453(3) 0.3453(4) 0.3856(3) 0.0313(9) Uani 1 1 d . . . 
C41 C 0.7134(3) 0.4516(3) 0.4659(3) 0.0299(8) Uani 1 1 d . . . 
C42 C 0.8233(3) 0.4841(3) 0.4669(3) 0.0290(8) Uani 1 1 d . . . 
H42 H 0.8563 0.4395 0.4152 0.035 Uiso 1 1 calc R . . 
C43 C 0.8853(3) 0.5801(3) 0.5417(3) 0.0337(9) Uani 1 1 d . . . 
H43 H 0.9606 0.6005 0.5418 0.040 Uiso 1 1 calc R . . 
C44 C 0.8374(3) 0.6473(4) 0.6175(3) 0.0383(10) Uani 1 1 d . . . 
H44 H 0.8798 0.7135 0.6694 0.046 Uiso 1 1 calc R . . 
C45 C 0.7273(4) 0.6161(4) 0.6161(3) 0.0400(10) Uani 1 1 d . . . 
H45 H 0.6937 0.6616 0.6669 0.048 Uiso 1 1 calc R . . 
C46 C 0.6663(3) 0.5195(4) 0.5415(3) 0.0375(10) Uani 1 1 d . . . 
H46 H 0.5910 0.4988 0.5416 0.045 Uiso 1 1 calc R . . 
C47 C 0.3248(4) -0.0034(4) 0.3114(4) 0.0481(11) Uani 1 1 d . . . 
H47A H 0.3925 -0.0053 0.3501 0.072 Uiso 1 1 calc R . . 
H47B H 0.3033 -0.0738 0.2520 0.072 Uiso 1 1 calc R . . 
H47C H 0.2672 0.0042 0.3513 0.072 Uiso 1 1 calc R . . 
N1 N 0.6049(2) 0.1387(3) 0.3161(2) 0.0319(7) Uani 1 1 d . . . 
N2 N 0.4791(2) -0.0590(3) 0.1512(2) 0.0311(7) Uani 1 1 d . . . 
N3 N 0.3735(3) 0.0822(3) 0.0751(2) 0.0328(8) Uani 1 1 d . . . 
N4 N 0.4944(2) 0.2792(3) 0.2408(2) 0.0292(7) Uani 1 1 d . . . 
O1 O 0.8572(3) 0.2427(3) 0.4248(3) 0.0571(9) Uani 1 1 d . . . 
O2 O 0.7240(3) 0.0979(3) 0.4176(2) 0.0480(8) Uani 1 1 d . . . 
O3 O 0.2481(2) -0.0119(3) -0.0636(2) 0.0466(8) Uani 1 1 d . . . 
O4 O 0.1880(3) 0.1277(3) -0.0921(3) 0.0732(11) Uani 1 1 d . . . 
O5 O 0.3418(2) 0.0915(2) 0.2834(2) 0.0346(6) Uani 1 1 d . . . 
Zn1 Zn 0.47213(4) 0.10978(4) 0.20760(3) 0.02810(19) Uani 1 1 d . . . 
H5O H 0.284(4) 0.086(4) 0.250(4) 0.044(14) Uiso 1 1 d . . . 
  
loop_ 
 _atom_site_aniso_label 
 _atom_site_aniso_U_11 
 _atom_site_aniso_U_22 
 _atom_site_aniso_U_33 
 _atom_site_aniso_U_23 
 _atom_site_aniso_U_13 
 _atom_site_aniso_U_12 
C1 0.0254(19) 0.036(2) 0.033(2) 0.0136(18) 0.0019(16) 0.0079(16) 
C2 0.023(2) 0.063(3) 0.033(2) 0.006(2) -0.0055(17) -0.0018(19) 
C3 0.081(4) 0.045(3) 0.048(3) 0.020(2) -0.001(3) 0.014(3) 
C4 0.096(5) 0.105(5) 0.063(4) 0.055(4) 0.028(3) 0.037(4) 
C5 0.096(5) 0.062(4) 0.064(4) 0.033(3) -0.020(3) 0.009(3) 
C6 0.056(3) 0.082(4) 0.070(4) 0.017(3) 0.024(3) 0.006(3) 
C7 0.029(2) 0.050(3) 0.034(2) 0.022(2) 0.0021(17) 0.0149(18) 
C8 0.033(2) 0.035(2) 0.032(2) 0.0141(18) 0.0027(16) 0.0128(17) 
C9 0.036(2) 0.028(2) 0.032(2) 0.0099(17) -0.0051(17) 0.0051(17) 
C10 0.053(3) 0.054(3) 0.043(2) 0.024(2) 0.007(2) 0.026(2) 
C11 0.057(3) 0.050(3) 0.064(3) 0.022(3) 0.002(2) 0.030(2) 
C12 0.065(3) 0.032(3) 0.050(3) 0.018(2) -0.018(2) 0.006(2) 
C13 0.092(4) 0.040(3) 0.052(3) 0.026(2) 0.011(3) 0.022(3) 
C14 0.065(3) 0.040(3) 0.049(3) 0.022(2) 0.013(2) 0.018(2) 
C15 0.029(2) 0.041(2) 0.031(2) 0.0178(18) 0.0066(16) 0.0151(17) 
C16 0.040(2) 0.039(3) 0.035(2) 0.0149(19) 0.0037(18) 0.0132(19) 
C17 0.034(2) 0.035(2) 0.033(2) 0.0124(18) 0.0020(17) 0.0072(17) 
C18 0.0265(19) 0.044(3) 0.0273(19) 0.0153(18) 0.0062(16) 0.0086(17) 
C19 0.0278(19) 0.038(2) 0.029(2) 0.0145(17) 0.0059(16) 0.0058(17) 
C20 0.029(2) 0.044(3) 0.034(2) 0.0259(19) 0.0047(16) 0.0055(17) 
C21 0.031(2) 0.048(3) 0.027(2) 0.0171(19) 0.0046(16) 0.0045(18) 
C22 0.044(2) 0.046(3) 0.031(2) 0.0195(19) 0.0021(18) 0.004(2) 
C23 0.041(2) 0.043(3) 0.051(3) 0.029(2) -0.007(2) -0.002(2) 
C24 0.027(2) 0.046(3) 0.081(3) 0.038(3) 0.003(2) 0.002(2) 
C25 0.033(2) 0.037(3) 0.062(3) 0.027(2) 0.012(2) 0.0085(19) 
C26 0.027(2) 0.051(3) 0.0256(19) 0.0179(19) 0.0028(16) 0.0064(18) 
C27 0.035(2) 0.082(4) 0.040(2) 0.045(3) 0.0021(19) 0.023(2) 
C28 0.033(2) 0.040(3) 0.039(2) 0.027(2) 0.0056(17) 0.0089(18) 
C29 0.027(2) 0.051(3) 0.042(2) 0.033(2) 0.0070(17) 0.0097(18) 
C30 0.027(2) 0.040(3) 0.043(2) 0.026(2) -0.0029(17) 0.0017(17) 
C31 0.062(3) 0.039(3) 0.039(2) 0.020(2) 0.008(2) 0.017(2) 
C32 0.080(4) 0.043(3) 0.037(2) 0.023(2) 0.005(2) 0.015(2) 
C33 0.051(3) 0.043(3) 0.059(3) 0.033(2) -0.003(2) 0.008(2) 
C34 0.042(2) 0.048(3) 0.060(3) 0.028(2) 0.009(2) 0.013(2) 
C35 0.038(2) 0.050(3) 0.050(3) 0.029(2) 0.007(2) 0.007(2) 
C36 0.0256(19) 0.042(3) 0.038(2) 0.0252(19) 0.0045(16) 0.0067(17) 
C37 0.029(2) 0.044(3) 0.045(2) 0.027(2) 0.0049(18) 0.0083(18) 
C38 0.029(2) 0.042(3) 0.039(2) 0.021(2) 0.0055(17) 0.0052(17) 
C39 0.0250(19) 0.041(2) 0.035(2) 0.0215(19) 0.0078(16) 0.0080(17) 
C40 0.0232(18) 0.042(3) 0.030(2) 0.0160(18) 0.0047(15) 0.0052(17) 
C41 0.029(2) 0.035(2) 0.032(2) 0.0187(17) 0.0037(16) 0.0110(16) 
C42 0.031(2) 0.029(2) 0.032(2) 0.0157(17) 0.0060(16) 0.0106(16) 
C43 0.032(2) 0.032(2) 0.040(2) 0.0171(18) 0.0056(17) 0.0077(17) 
C44 0.041(2) 0.035(2) 0.035(2) 0.0115(18) 0.0000(18) 0.0063(18) 
C45 0.045(2) 0.043(3) 0.036(2) 0.016(2) 0.0125(19) 0.016(2) 
C46 0.031(2) 0.047(3) 0.038(2) 0.020(2) 0.0070(17) 0.0100(18) 
C47 0.052(3) 0.058(3) 0.052(3) 0.035(2) 0.022(2) 0.019(2) 
N1 0.0266(16) 0.038(2) 0.0338(17) 0.0164(15) 0.0014(13) 0.0103(14) 
N2 0.0277(16) 0.041(2) 0.0283(16) 0.0160(15) 0.0050(13) 0.0108(14) 
N3 0.0299(17) 0.044(2) 0.0299(17) 0.0204(16) 0.0039(14) 0.0081(15) 
N4 0.0242(16) 0.0352(19) 0.0320(17) 0.0188(15) 0.0026(13) 0.0036(14) 
O1 0.0452(19) 0.050(2) 0.072(2) 0.0229(18) 0.0015(16) 0.0062(15) 
O2 0.0499(18) 0.047(2) 0.0490(18) 0.0225(15) -0.0043(15) 0.0147(15) 
O3 0.0418(17) 0.056(2) 0.0428(17) 0.0262(15) -0.0034(13) 0.0033(14) 
O4 0.073(3) 0.062(3) 0.083(3) 0.040(2) -0.014(2) 0.0005(19) 
O5 0.0303(15) 0.0415(17) 0.0376(15) 0.0205(13) 0.0087(13) 0.0082(12) 
Zn1 0.0244(3) 0.0358(3) 0.0282(3) 0.0172(2) 0.0026(2) 0.0076(2) 
  
_geom_special_details 
; 
 All esds (except the esd in the dihedral angle between two l.s. planes) 
 are estimated using the full covariance matrix.  The cell esds are taken 
 into account individually in the estimation of esds in distances, angles 
 and torsion angles; correlations between esds in cell parameters are only 
 used when they are defined by crystal symmetry.  An approximate (isotropic) 
 treatment of cell esds is used for estimating esds involving l.s. planes. 
; 
  
loop_ 
 _geom_bond_atom_site_label_1 
 _geom_bond_atom_site_label_2 
 _geom_bond_distance 
 _geom_bond_site_symmetry_2 
 _geom_bond_publ_flag 
C1 N1 1.360(5) . ? 
C1 C40 1.372(6) . ? 
C1 C2 1.496(6) . ? 
C2 O1 1.407(5) . ? 
C2 O2 1.510(6) . ? 
C2 C3 1.517(7) . ? 
C3 C4 1.506(8) . ? 
C3 C5 1.554(7) . ? 
C3 H3 1.0000 . ? 
C4 H4A 0.9800 . ? 
C4 H4B 0.9800 . ? 
C4 H4C 0.9800 . ? 
C5 H5A 0.9800 . ? 
C5 H5B 0.9800 . ? 
C5 H5C 0.9800 . ? 
C6 O1 1.449(7) . ? 
C6 H6A 0.9800 . ? 
C6 H6B 0.9800 . ? 
C6 H6C 0.9800 . ? 
C7 N1 1.338(5) . ? 
C7 O2 1.354(5) . ? 
C7 C8 1.394(6) . ? 
C8 C15 1.401(6) . ? 
C8 C9 1.503(5) . ? 
C9 C14 1.367(6) . ? 
C9 C10 1.374(6) . ? 
C10 C11 1.396(6) . ? 
C10 H10 0.9500 . ? 
C11 C12 1.366(7) . ? 
C11 H11 0.9500 . ? 
C12 C13 1.355(8) . ? 
C12 H12 0.9500 . ? 
C13 C14 1.388(7) . ? 
C13 H13 0.9500 . ? 
C14 H14 0.9500 . ? 
C15 N2 1.380(5) . ? 
C15 C16 1.437(6) . ? 
C16 C17 1.342(6) . ? 
C16 H16 0.9500 . ? 
C17 C18 1.440(6) . ? 
C17 H17 0.9500 . ? 
C18 N2 1.384(5) . ? 
C18 C19 1.394(5) . ? 
C19 C26 1.404(6) . ? 
C19 C20 1.498(6) . ? 
C20 C25 1.389(6) . ? 
C20 C21 1.392(6) . ? 
C21 C22 1.400(6) . ? 
C21 H21 0.9500 . ? 
C22 C23 1.373(6) . ? 
C22 H22 0.9500 . ? 
C23 C24 1.367(7) . ? 
C23 H23 0.9500 . ? 
C24 C25 1.381(7) . ? 
C24 H24 0.9500 . ? 
C25 H25 0.9500 . ? 
C26 N3 1.332(5) . ? 
C26 O3 1.382(5) . ? 
C27 O4 1.223(5) . ? 
C27 C28 1.402(6) . ? 
C27 O3 1.447(6) . ? 
C28 N3 1.374(5) . ? 
C28 C29 1.396(6) . ? 
C29 C36 1.410(6) . ? 
C29 C30 1.508(6) . ? 
C30 C31 1.370(6) . ? 
C30 C35 1.400(6) . ? 
C31 C32 1.394(6) . ? 
C31 H31 0.9500 . ? 
C32 C33 1.370(7) . ? 
C32 H32 0.9500 . ? 
C33 C34 1.389(7) . ? 
C33 H33 0.9500 . ? 
C34 C35 1.404(6) . ? 
C34 H34 0.9500 . ? 
C35 H35 0.9500 . ? 
C36 N4 1.392(5) . ? 
C36 C37 1.403(6) . ? 
C37 C38 1.358(6) . ? 
C37 H37 0.9500 . ? 
C38 C39 1.423(6) . ? 
C38 H38 0.9500 . ? 
C39 N4 1.361(5) . ? 
C39 C40 1.440(5) . ? 
C40 C41 1.509(6) . ? 
C41 C42 1.388(5) . ? 
C41 C46 1.393(6) . ? 
C42 C43 1.377(6) . ? 
C42 H42 0.9500 . ? 
C43 C44 1.397(6) . ? 
C43 H43 0.9500 . ? 
C44 C45 1.387(6) . ? 
C44 H44 0.9500 . ? 
C45 C46 1.376(6) . ? 
C45 H45 0.9500 . ? 
C46 H46 0.9500 . ? 
C47 O5 1.438(5) . ? 
C47 H47A 0.9800 . ? 
C47 H47B 0.9800 . ? 
C47 H47C 0.9800 . ? 
N1 Zn1 2.072(3) . ? 
N2 Zn1 2.048(3) . ? 
N3 Zn1 2.083(3) . ? 
N4 Zn1 2.036(3) . ? 
O5 Zn1 2.129(3) . ? 
O5 H5O 0.81(5) . ? 
  
loop_ 
 _geom_angle_atom_site_label_1 
 _geom_angle_atom_site_label_2 
 _geom_angle_atom_site_label_3 
 _geom_angle 
 _geom_angle_site_symmetry_1 
 _geom_angle_site_symmetry_3 
 _geom_angle_publ_flag 
N1 C1 C40 126.3(3) . . ? 
N1 C1 C2 109.3(4) . . ? 
C40 C1 C2 124.4(4) . . ? 
O1 C2 C1 115.7(4) . . ? 
O1 C2 O2 104.4(4) . . ? 
C1 C2 O2 101.2(3) . . ? 
O1 C2 C3 108.6(4) . . ? 
C1 C2 C3 121.0(4) . . ? 
O2 C2 C3 103.4(4) . . ? 
C4 C3 C2 111.6(5) . . ? 
C4 C3 C5 112.0(5) . . ? 
C2 C3 C5 111.6(5) . . ? 
C4 C3 H3 107.1 . . ? 
C2 C3 H3 107.1 . . ? 
C5 C3 H3 107.1 . . ? 
C3 C4 H4A 109.5 . . ? 
C3 C4 H4B 109.5 . . ? 
H4A C4 H4B 109.5 . . ? 
C3 C4 H4C 109.5 . . ? 
H4A C4 H4C 109.5 . . ? 
H4B C4 H4C 109.5 . . ? 
C3 C5 H5A 109.5 . . ? 
C3 C5 H5B 109.5 . . ? 
H5A C5 H5B 109.5 . . ? 
C3 C5 H5C 109.5 . . ? 
H5A C5 H5C 109.5 . . ? 
H5B C5 H5C 109.5 . . ? 
O1 C6 H6A 109.5 . . ? 
O1 C6 H6B 109.5 . . ? 
H6A C6 H6B 109.5 . . ? 
O1 C6 H6C 109.5 . . ? 
H6A C6 H6C 109.5 . . ? 
H6B C6 H6C 109.5 . . ? 
N1 C7 O2 114.1(4) . . ? 
N1 C7 C8 128.3(4) . . ? 
O2 C7 C8 117.7(3) . . ? 
C7 C8 C15 123.7(4) . . ? 
C7 C8 C9 117.3(3) . . ? 
C15 C8 C9 118.9(4) . . ? 
C14 C9 C10 118.9(4) . . ? 
C14 C9 C8 120.9(4) . . ? 
C10 C9 C8 120.1(4) . . ? 
C9 C10 C11 119.8(4) . . ? 
C9 C10 H10 120.1 . . ? 
C11 C10 H10 120.1 . . ? 
C12 C11 C10 120.2(5) . . ? 
C12 C11 H11 119.9 . . ? 
C10 C11 H11 119.9 . . ? 
C13 C12 C11 120.2(4) . . ? 
C13 C12 H12 119.9 . . ? 
C11 C12 H12 119.9 . . ? 
C12 C13 C14 119.7(5) . . ? 
C12 C13 H13 120.2 . . ? 
C14 C13 H13 120.2 . . ? 
C9 C14 C13 121.2(5) . . ? 
C9 C14 H14 119.4 . . ? 
C13 C14 H14 119.4 . . ? 
N2 C15 C8 126.2(4) . . ? 
N2 C15 C16 109.7(3) . . ? 
C8 C15 C16 124.1(4) . . ? 
C17 C16 C15 107.4(4) . . ? 
C17 C16 H16 126.3 . . ? 
C15 C16 H16 126.3 . . ? 
C16 C17 C18 107.7(4) . . ? 
C16 C17 H17 126.1 . . ? 
C18 C17 H17 126.1 . . ? 
N2 C18 C19 125.8(4) . . ? 
N2 C18 C17 109.2(3) . . ? 
C19 C18 C17 125.0(4) . . ? 
C18 C19 C26 122.7(4) . . ? 
C18 C19 C20 119.5(4) . . ? 
C26 C19 C20 117.7(3) . . ? 
C25 C20 C21 117.9(4) . . ? 
C25 C20 C19 120.9(4) . . ? 
C21 C20 C19 121.2(3) . . ? 
C20 C21 C22 120.8(4) . . ? 
C20 C21 H21 119.6 . . ? 
C22 C21 H21 119.6 . . ? 
C23 C22 C21 119.6(4) . . ? 
C23 C22 H22 120.2 . . ? 
C21 C22 H22 120.2 . . ? 
C24 C23 C22 120.1(4) . . ? 
C24 C23 H23 119.9 . . ? 
C22 C23 H23 119.9 . . ? 
C23 C24 C25 120.5(4) . . ? 
C23 C24 H24 119.7 . . ? 
C25 C24 H24 119.7 . . ? 
C24 C25 C20 121.1(4) . . ? 
C24 C25 H25 119.5 . . ? 
C20 C25 H25 119.5 . . ? 
N3 C26 O3 112.3(4) . . ? 
N3 C26 C19 129.2(3) . . ? 
O3 C26 C19 118.4(4) . . ? 
O4 C27 C28 141.8(5) . . ? 
O4 C27 O3 111.7(4) . . ? 
C28 C27 O3 106.3(3) . . ? 
N3 C28 C29 125.7(4) . . ? 
N3 C28 C27 108.9(4) . . ? 
C29 C28 C27 125.3(4) . . ? 
C28 C29 C36 125.2(4) . . ? 
C28 C29 C30 119.0(4) . . ? 
C36 C29 C30 115.8(4) . . ? 
C31 C30 C35 119.3(4) . . ? 
C31 C30 C29 121.0(4) . . ? 
C35 C30 C29 119.6(4) . . ? 
C30 C31 C32 120.5(4) . . ? 
C30 C31 H31 119.7 . . ? 
C32 C31 H31 119.7 . . ? 
C33 C32 C31 120.5(4) . . ? 
C33 C32 H32 119.8 . . ? 
C31 C32 H32 119.8 . . ? 
C32 C33 C34 120.3(4) . . ? 
C32 C33 H33 119.8 . . ? 
C34 C33 H33 119.8 . . ? 
C33 C34 C35 119.1(4) . . ? 
C33 C34 H34 120.5 . . ? 
C35 C34 H34 120.5 . . ? 
C30 C35 C34 120.2(4) . . ? 
C30 C35 H35 119.9 . . ? 
C34 C35 H35 119.9 . . ? 
N4 C36 C37 109.4(3) . . ? 
N4 C36 C29 125.2(4) . . ? 
C37 C36 C29 125.3(4) . . ? 
C38 C37 C36 107.8(4) . . ? 
C38 C37 H37 126.1 . . ? 
C36 C37 H37 126.1 . . ? 
C37 C38 C39 106.9(4) . . ? 
C37 C38 H38 126.6 . . ? 
C39 C38 H38 126.6 . . ? 
N4 C39 C38 110.0(3) . . ? 
N4 C39 C40 125.8(4) . . ? 
C38 C39 C40 124.1(4) . . ? 
C1 C40 C39 124.8(4) . . ? 
C1 C40 C41 119.6(3) . . ? 
C39 C40 C41 115.6(4) . . ? 
C42 C41 C46 118.5(4) . . ? 
C42 C41 C40 121.5(3) . . ? 
C46 C41 C40 120.0(3) . . ? 
C43 C42 C41 121.1(4) . . ? 
C43 C42 H42 119.5 . . ? 
C41 C42 H42 119.5 . . ? 
C42 C43 C44 120.0(4) . . ? 
C42 C43 H43 120.0 . . ? 
C44 C43 H43 120.0 . . ? 
C45 C44 C43 119.1(4) . . ? 
C45 C44 H44 120.4 . . ? 
C43 C44 H44 120.4 . . ? 
C46 C45 C44 120.4(4) . . ? 
C46 C45 H45 119.8 . . ? 
C44 C45 H45 119.8 . . ? 
C45 C46 C41 120.9(4) . . ? 
C45 C46 H46 119.6 . . ? 
C41 C46 H46 119.6 . . ? 
O5 C47 H47A 109.5 . . ? 
O5 C47 H47B 109.5 . . ? 
H47A C47 H47B 109.5 . . ? 
O5 C47 H47C 109.5 . . ? 
H47A C47 H47C 109.5 . . ? 
H47B C47 H47C 109.5 . . ? 
C7 N1 C1 108.5(3) . . ? 
C7 N1 Zn1 124.8(3) . . ? 
C1 N1 Zn1 126.6(3) . . ? 
C15 N2 C18 106.1(3) . . ? 
C15 N2 Zn1 124.4(3) . . ? 
C18 N2 Zn1 125.4(3) . . ? 
C26 N3 C28 107.9(3) . . ? 
C26 N3 Zn1 124.5(3) . . ? 
C28 N3 Zn1 126.4(3) . . ? 
C39 N4 C36 106.0(3) . . ? 
C39 N4 Zn1 126.6(3) . . ? 
C36 N4 Zn1 127.4(3) . . ? 
C2 O1 C6 115.4(4) . . ? 
C7 O2 C2 105.9(3) . . ? 
C26 O3 C27 104.6(3) . . ? 
C47 O5 Zn1 119.2(2) . . ? 
C47 O5 H5O 104(3) . . ? 
Zn1 O5 H5O 111(3) . . ? 
N4 Zn1 N2 165.02(12) . . ? 
N4 Zn1 N1 89.48(13) . . ? 
N2 Zn1 N1 89.39(13) . . ? 
N4 Zn1 N3 88.72(13) . . ? 
N2 Zn1 N3 88.17(13) . . ? 
N1 Zn1 N3 163.64(13) . . ? 
N4 Zn1 O5 100.08(12) . . ? 
N2 Zn1 O5 94.81(12) . . ? 
N1 Zn1 O5 100.57(12) . . ? 
N3 Zn1 O5 95.76(12) . . ? 
  
loop_ 
 _geom_torsion_atom_site_label_1 
 _geom_torsion_atom_site_label_2 
 _geom_torsion_atom_site_label_3 
 _geom_torsion_atom_site_label_4 
 _geom_torsion 
 _geom_torsion_site_symmetry_1 
 _geom_torsion_site_symmetry_2 
 _geom_torsion_site_symmetry_3 
 _geom_torsion_site_symmetry_4 
 _geom_torsion_publ_flag 
N1 C1 C2 O1 103.8(4) . . . . ? 
C40 C1 C2 O1 -74.2(5) . . . . ? 
N1 C1 C2 O2 -8.3(4) . . . . ? 
C40 C1 C2 O2 173.7(4) . . . . ? 
N1 C1 C2 C3 -121.5(5) . . . . ? 
C40 C1 C2 C3 60.5(6) . . . . ? 
O1 C2 C3 C4 -175.4(4) . . . . ? 
C1 C2 C3 C4 47.2(7) . . . . ? 
O2 C2 C3 C4 -64.9(5) . . . . ? 
O1 C2 C3 C5 -49.3(6) . . . . ? 
C1 C2 C3 C5 173.3(5) . . . . ? 
O2 C2 C3 C5 61.2(5) . . . . ? 
N1 C7 C8 C15 3.1(7) . . . . ? 
O2 C7 C8 C15 -177.6(4) . . . . ? 
N1 C7 C8 C9 -178.1(4) . . . . ? 
O2 C7 C8 C9 1.2(5) . . . . ? 
C7 C8 C9 C14 73.0(5) . . . . ? 
C15 C8 C9 C14 -108.1(5) . . . . ? 
C7 C8 C9 C10 -107.3(5) . . . . ? 
C15 C8 C9 C10 71.6(5) . . . . ? 
C14 C9 C10 C11 -0.5(7) . . . . ? 
C8 C9 C10 C11 179.8(4) . . . . ? 
C9 C10 C11 C12 0.6(8) . . . . ? 
C10 C11 C12 C13 -0.2(8) . . . . ? 
C11 C12 C13 C14 -0.2(8) . . . . ? 
C10 C9 C14 C13 0.0(7) . . . . ? 
C8 C9 C14 C13 179.7(4) . . . . ? 
C12 C13 C14 C9 0.4(8) . . . . ? 
C7 C8 C15 N2 4.0(6) . . . . ? 
C9 C8 C15 N2 -174.8(4) . . . . ? 
C7 C8 C15 C16 -172.5(4) . . . . ? 
C9 C8 C15 C16 8.8(6) . . . . ? 
N2 C15 C16 C17 -0.4(5) . . . . ? 
C8 C15 C16 C17 176.6(4) . . . . ? 
C15 C16 C17 C18 0.5(4) . . . . ? 
C16 C17 C18 N2 -0.4(4) . . . . ? 
C16 C17 C18 C19 -177.8(4) . . . . ? 
N2 C18 C19 C26 -2.0(6) . . . . ? 
C17 C18 C19 C26 175.0(4) . . . . ? 
N2 C18 C19 C20 -177.8(3) . . . . ? 
C17 C18 C19 C20 -0.9(6) . . . . ? 
C18 C19 C20 C25 118.6(4) . . . . ? 
C26 C19 C20 C25 -57.5(5) . . . . ? 
C18 C19 C20 C21 -60.3(5) . . . . ? 
C26 C19 C20 C21 123.6(4) . . . . ? 
C25 C20 C21 C22 -0.3(6) . . . . ? 
C19 C20 C21 C22 178.6(4) . . . . ? 
C20 C21 C22 C23 0.0(6) . . . . ? 
C21 C22 C23 C24 0.1(6) . . . . ? 
C22 C23 C24 C25 0.0(7) . . . . ? 
C23 C24 C25 C20 -0.2(7) . . . . ? 
C21 C20 C25 C24 0.3(6) . . . . ? 
C19 C20 C25 C24 -178.6(4) . . . . ? 
C18 C19 C26 N3 -4.4(6) . . . . ? 
C20 C19 C26 N3 171.6(4) . . . . ? 
C18 C19 C26 O3 178.3(3) . . . . ? 
C20 C19 C26 O3 -5.8(5) . . . . ? 
O4 C27 C28 N3 175.4(6) . . . . ? 
O3 C27 C28 N3 0.7(4) . . . . ? 
O4 C27 C28 C29 -1.9(9) . . . . ? 
O3 C27 C28 C29 -176.6(4) . . . . ? 
N3 C28 C29 C36 2.6(6) . . . . ? 
C27 C28 C29 C36 179.4(4) . . . . ? 
N3 C28 C29 C30 -176.0(4) . . . . ? 
C27 C28 C29 C30 0.9(6) . . . . ? 
C28 C29 C30 C31 -68.9(5) . . . . ? 
C36 C29 C30 C31 112.4(5) . . . . ? 
C28 C29 C30 C35 113.2(5) . . . . ? 
C36 C29 C30 C35 -65.4(5) . . . . ? 
C35 C30 C31 C32 -2.5(7) . . . . ? 
C29 C30 C31 C32 179.6(4) . . . . ? 
C30 C31 C32 C33 0.9(8) . . . . ? 
C31 C32 C33 C34 1.1(8) . . . . ? 
C32 C33 C34 C35 -1.4(7) . . . . ? 
C31 C30 C35 C34 2.2(7) . . . . ? 
C29 C30 C35 C34 -179.9(4) . . . . ? 
C33 C34 C35 C30 -0.3(7) . . . . ? 
C28 C29 C36 N4 -4.2(6) . . . . ? 
C30 C29 C36 N4 174.3(3) . . . . ? 
C28 C29 C36 C37 171.9(4) . . . . ? 
C30 C29 C36 C37 -9.5(6) . . . . ? 
N4 C36 C37 C38 0.0(4) . . . . ? 
C29 C36 C37 C38 -176.7(4) . . . . ? 
C36 C37 C38 C39 0.2(4) . . . . ? 
C37 C38 C39 N4 -0.3(4) . . . . ? 
C37 C38 C39 C40 176.1(4) . . . . ? 
N1 C1 C40 C39 -3.3(6) . . . . ? 
C2 C1 C40 C39 174.4(4) . . . . ? 
N1 C1 C40 C41 177.0(3) . . . . ? 
C2 C1 C40 C41 -5.4(6) . . . . ? 
N4 C39 C40 C1 1.2(6) . . . . ? 
C38 C39 C40 C1 -174.6(4) . . . . ? 
N4 C39 C40 C41 -179.1(3) . . . . ? 
C38 C39 C40 C41 5.2(5) . . . . ? 
C1 C40 C41 C42 69.6(5) . . . . ? 
C39 C40 C41 C42 -110.1(4) . . . . ? 
C1 C40 C41 C46 -110.1(4) . . . . ? 
C39 C40 C41 C46 70.2(5) . . . . ? 
C46 C41 C42 C43 1.1(6) . . . . ? 
C40 C41 C42 C43 -178.6(3) . . . . ? 
C41 C42 C43 C44 -0.8(6) . . . . ? 
C42 C43 C44 C45 -0.1(6) . . . . ? 
C43 C44 C45 C46 0.7(6) . . . . ? 
C44 C45 C46 C41 -0.4(6) . . . . ? 
C42 C41 C46 C45 -0.5(6) . . . . ? 
C40 C41 C46 C45 179.2(4) . . . . ? 
O2 C7 N1 C1 2.4(5) . . . . ? 
C8 C7 N1 C1 -178.3(4) . . . . ? 
O2 C7 N1 Zn1 -173.8(3) . . . . ? 
C8 C7 N1 Zn1 5.6(6) . . . . ? 
C40 C1 N1 C7 -177.8(4) . . . . ? 
C2 C1 N1 C7 4.3(4) . . . . ? 
C40 C1 N1 Zn1 -1.7(6) . . . . ? 
C2 C1 N1 Zn1 -179.7(3) . . . . ? 
C8 C15 N2 C18 -176.7(4) . . . . ? 
C16 C15 N2 C18 0.1(4) . . . . ? 
C8 C15 N2 Zn1 -18.5(5) . . . . ? 
C16 C15 N2 Zn1 158.3(3) . . . . ? 
C19 C18 N2 C15 177.5(4) . . . . ? 
C17 C18 N2 C15 0.1(4) . . . . ? 
C19 C18 N2 Zn1 19.6(5) . . . . ? 
C17 C18 N2 Zn1 -157.8(3) . . . . ? 
O3 C26 N3 C28 2.1(4) . . . . ? 
C19 C26 N3 C28 -175.4(4) . . . . ? 
O3 C26 N3 Zn1 169.9(2) . . . . ? 
C19 C26 N3 Zn1 -7.6(6) . . . . ? 
C29 C28 N3 C26 175.6(4) . . . . ? 
C27 C28 N3 C26 -1.7(4) . . . . ? 
C29 C28 N3 Zn1 8.1(6) . . . . ? 
C27 C28 N3 Zn1 -169.1(3) . . . . ? 
C38 C39 N4 C36 0.3(4) . . . . ? 
C40 C39 N4 C36 -176.0(3) . . . . ? 
C38 C39 N4 Zn1 -178.0(3) . . . . ? 
C40 C39 N4 Zn1 5.8(5) . . . . ? 
C37 C36 N4 C39 -0.2(4) . . . . ? 
C29 C36 N4 C39 176.5(4) . . . . ? 
C37 C36 N4 Zn1 178.0(3) . . . . ? 
C29 C36 N4 Zn1 -5.2(5) . . . . ? 
C1 C2 O1 C6 -46.7(6) . . . . ? 
O2 C2 O1 C6 63.5(5) . . . . ? 
C3 C2 O1 C6 173.3(5) . . . . ? 
N1 C7 O2 C2 -7.8(4) . . . . ? 
C8 C7 O2 C2 172.8(4) . . . . ? 
O1 C2 O2 C7 -111.2(4) . . . . ? 
C1 C2 O2 C7 9.3(4) . . . . ? 
C3 C2 O2 C7 135.3(4) . . . . ? 
N3 C26 O3 C27 -1.7(4) . . . . ? 
C19 C26 O3 C27 176.1(3) . . . . ? 
O4 C27 O3 C26 -175.9(4) . . . . ? 
C28 C27 O3 C26 0.6(4) . . . . ? 
C39 N4 Zn1 N2 -93.3(5) . . . . ? 
C36 N4 Zn1 N2 88.8(5) . . . . ? 
C39 N4 Zn1 N1 -7.6(3) . . . . ? 
C36 N4 Zn1 N1 174.6(3) . . . . ? 
C39 N4 Zn1 N3 -171.3(3) . . . . ? 
C36 N4 Zn1 N3 10.8(3) . . . . ? 
C39 N4 Zn1 O5 93.1(3) . . . . ? 
C36 N4 Zn1 O5 -84.8(3) . . . . ? 
C15 N2 Zn1 N4 105.3(5) . . . . ? 
C18 N2 Zn1 N4 -100.7(5) . . . . ? 
C15 N2 Zn1 N1 19.6(3) . . . . ? 
C18 N2 Zn1 N1 173.6(3) . . . . ? 
C15 N2 Zn1 N3 -176.6(3) . . . . ? 
C18 N2 Zn1 N3 -22.6(3) . . . . ? 
C15 N2 Zn1 O5 -81.0(3) . . . . ? 
C18 N2 Zn1 O5 73.0(3) . . . . ? 
C7 N1 Zn1 N4 -178.8(3) . . . . ? 
C1 N1 Zn1 N4 5.7(3) . . . . ? 
C7 N1 Zn1 N2 -13.7(3) . . . . ? 
C1 N1 Zn1 N2 170.8(3) . . . . ? 
C7 N1 Zn1 N3 -95.1(5) . . . . ? 
C1 N1 Zn1 N3 89.4(5) . . . . ? 
C7 N1 Zn1 O5 81.0(3) . . . . ? 
C1 N1 Zn1 O5 -94.4(3) . . . . ? 
C26 N3 Zn1 N4 -177.6(3) . . . . ? 
C28 N3 Zn1 N4 -12.2(3) . . . . ? 
C26 N3 Zn1 N2 17.0(3) . . . . ? 
C28 N3 Zn1 N2 -177.5(3) . . . . ? 
C26 N3 Zn1 N1 98.6(5) . . . . ? 
C28 N3 Zn1 N1 -96.0(5) . . . . ? 
C26 N3 Zn1 O5 -77.6(3) . . . . ? 
C28 N3 Zn1 O5 87.8(3) . . . . ? 
C47 O5 Zn1 N4 -157.1(3) . . . . ? 
C47 O5 Zn1 N2 24.5(3) . . . . ? 
C47 O5 Zn1 N1 -65.7(3) . . . . ? 
C47 O5 Zn1 N3 113.2(3) . . . . ? 
  
_diffrn_measured_fraction_theta_max    0.947 
_diffrn_reflns_theta_full              61.00 
_diffrn_measured_fraction_theta_full   0.947 
_refine_diff_density_max    1.736 
_refine_diff_density_min   -0.441 
_refine_diff_density_rms    0.080

# SQUEEZE RESULTS (APPEND TO CIF) 
# Note: Data are Listed for all Voids in the P1 Unit Cell 
# i.e. Centre of Gravity, Solvent Accessible Volume, 
# Recovered number of Electrons in the Void and 
# Details about the Squeezed Material 
loop_ 
  _platon_squeeze_void_nr 
  _platon_squeeze_void_average_x 
  _platon_squeeze_void_average_y 
  _platon_squeeze_void_average_z 
  _platon_squeeze_void_volume 
  _platon_squeeze_void_count_electrons 
  _platon_squeeze_void_content 
   1  0.000  0.000 -0.011       360        96 ' ' 
_platon_squeeze_details 
; 
; 
